# Supplementary material
Source: PubMed Central journal article supplement (PMC3387270)
Supplement: NIHMS153941-supplement-supplement_1.pdf [file NIHMS153941-supplement-supplement_1.pdf]

**Supplemental Table.** Comparison of the PPV of stroke diagnostic codes used in the *in-patient* setting in previous studies of adult and pediatric subjects

| ICD-9 Code                                     | Adult Studies                         |                                      | Pediatric Studies                    |                                      |
|------------------------------------------------|---------------------------------------|--------------------------------------|--------------------------------------|--------------------------------------|
|                                                | Goldstein, 1998 <sup>6</sup>          | Broderick, 1998 <sup>7</sup>         | Golomb, 2007 <sup>8</sup>            | Present Study                        |
|                                                | N= 175*<br>PPV% (95% CI) <sup>1</sup> | N=509*<br>PPV% (95% CI) <sup>1</sup> | N=404*<br>PPV% (95% CI) <sup>1</sup> | N=370*<br>PPV% (95% CI) <sup>1</sup> |
| 430 (Subarachnoid hemorrhage)                  | --                                    | 64 (35-87)                           | --                                   | 82 (66-92)                           |
| 431 (Intracerebral hemorrhage)                 | --                                    | 83 (65-94)                           | --                                   | 79 (65-89)                           |
| 433.x (Occlusion of precerebral arteries)      | 4 (1-14)                              | 35 (17-56)                           | 79 (49-95)                           | 38 (9-76)                            |
| 434.x (Occlusion of cerebral arteries)         | 82 (73-88)                            | 80 (74-86)                           | 62 (55-68)                           | 74 (55-88)                           |
| 435.x (Transient cerebral ischemia)            | --                                    | 83 (72-91)                           | 50 (21-79)                           | 67 (35-90)                           |
| 436 (Acute, ill-defined cerebrovascular event) | 79 (54-94)                            | 64 (55-73)                           | 88 (77-96)                           | 46 (19-75)                           |
| 437 (Other ill-defined cerebrovascular event)  | --                                    | 12 (5-22)                            | 59 (46-71)                           | 1 (3-100)                            |

\*Total number of confirmed stroke cases identified through ICD-9 code searches

<sup>1</sup>Confidence intervals calculated by the authors of this paper
